# Supplementary material for: Fatty Acids Rescue the Thermogenic Function of Sympathetically Denervated Brown Fat
Source: MDPI journal article supplement (doi:10.3390/biom11101428), 2021-09-29

### **Supplemental Figure legends**

**Supplemental figure S1.** Mice with a bilateral surgical SNS denervation in interscapular BAT (iBAT) after a 7-day recovery. (A) Body weight of denervated and sham-operated mice housed at room temperature. (B) Image of iBAT of denervated and sham-operated mice housed at room temperature. (C) Fat pad weight of denervated and sham-operated mice housed at room temperature. All data are expressed as mean  $\pm$  SEM; n = 6-7.

**Supplemental figure S2.** Mice with a bilateral surgical SNS denervation in iBAT after a 16-hour cold exposure. (A) Body weight of denervated and sham-operated mice after a 16-hour cold exposure. (B) Image of iBAT of denervated and sham-operated mice after a 16-hour cold exposure. (C) Fat pad weight of denervated and sham-operated mice after a 16-hour cold exposure. All data are expressed as mean  $\pm$  SEM; n = 8.

**Supplemental figure S3.** Mice with a bilateral surgical SNS denervation in iBAT after a 7-day cold exposure. (A) Body weight of denervated and sham-operated mice after a 7-day cold exposure. (B) Image of iBAT of denervated and sham-operated mice after a 7-day cold exposure. (C) Fat pad weight of denervated and sham-operated mice after a 7-day cold exposure. All data are expressed as mean  $\pm$  SEM; n = 8. \*p<0.05 vs. sham.

**Supplemental figure S4.** Olive oil gavage substantially rescues the temperature of AC58KO mice challenged with cold in the absence of food. 4 hours before the cold exposure, food was removed from the cage and followed by olive oil (200  $\mu$ l, water as a control) gavage 30 min before the cold exposure. All data are expressed as mean  $\pm$  SEM; n = 4. \*p<0.05 vs. water.

# Supplemental figure S1

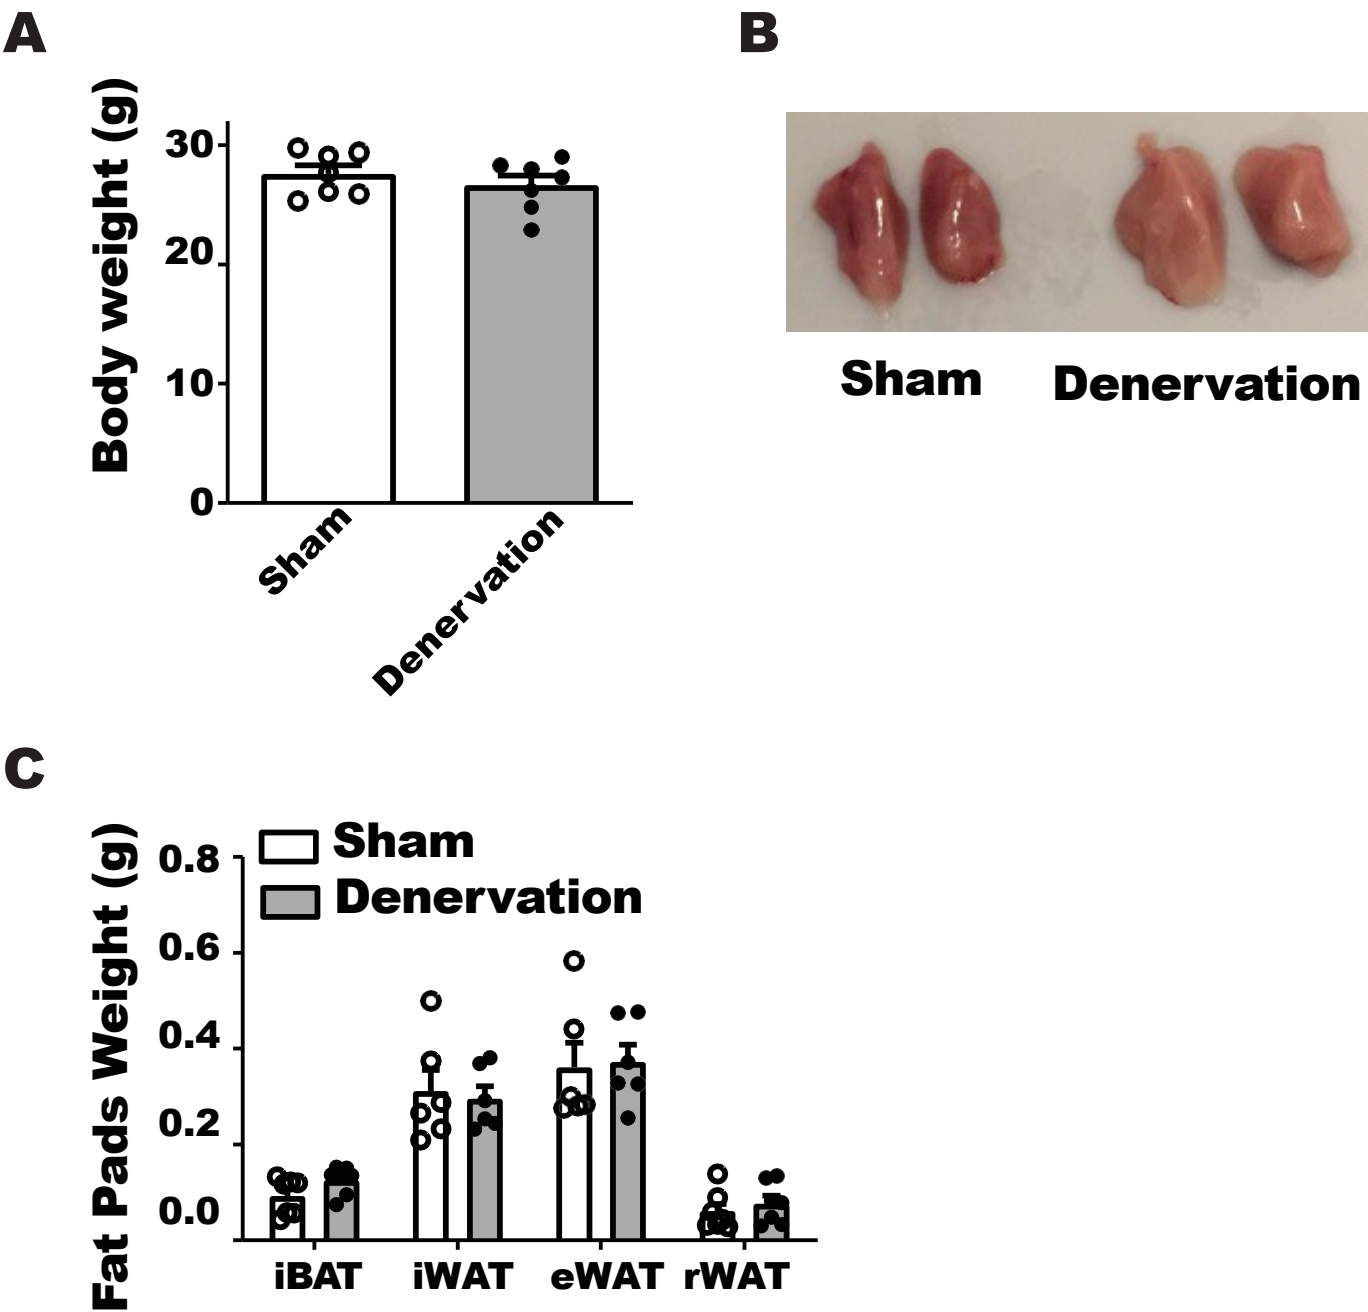

# Supplemental figure S2

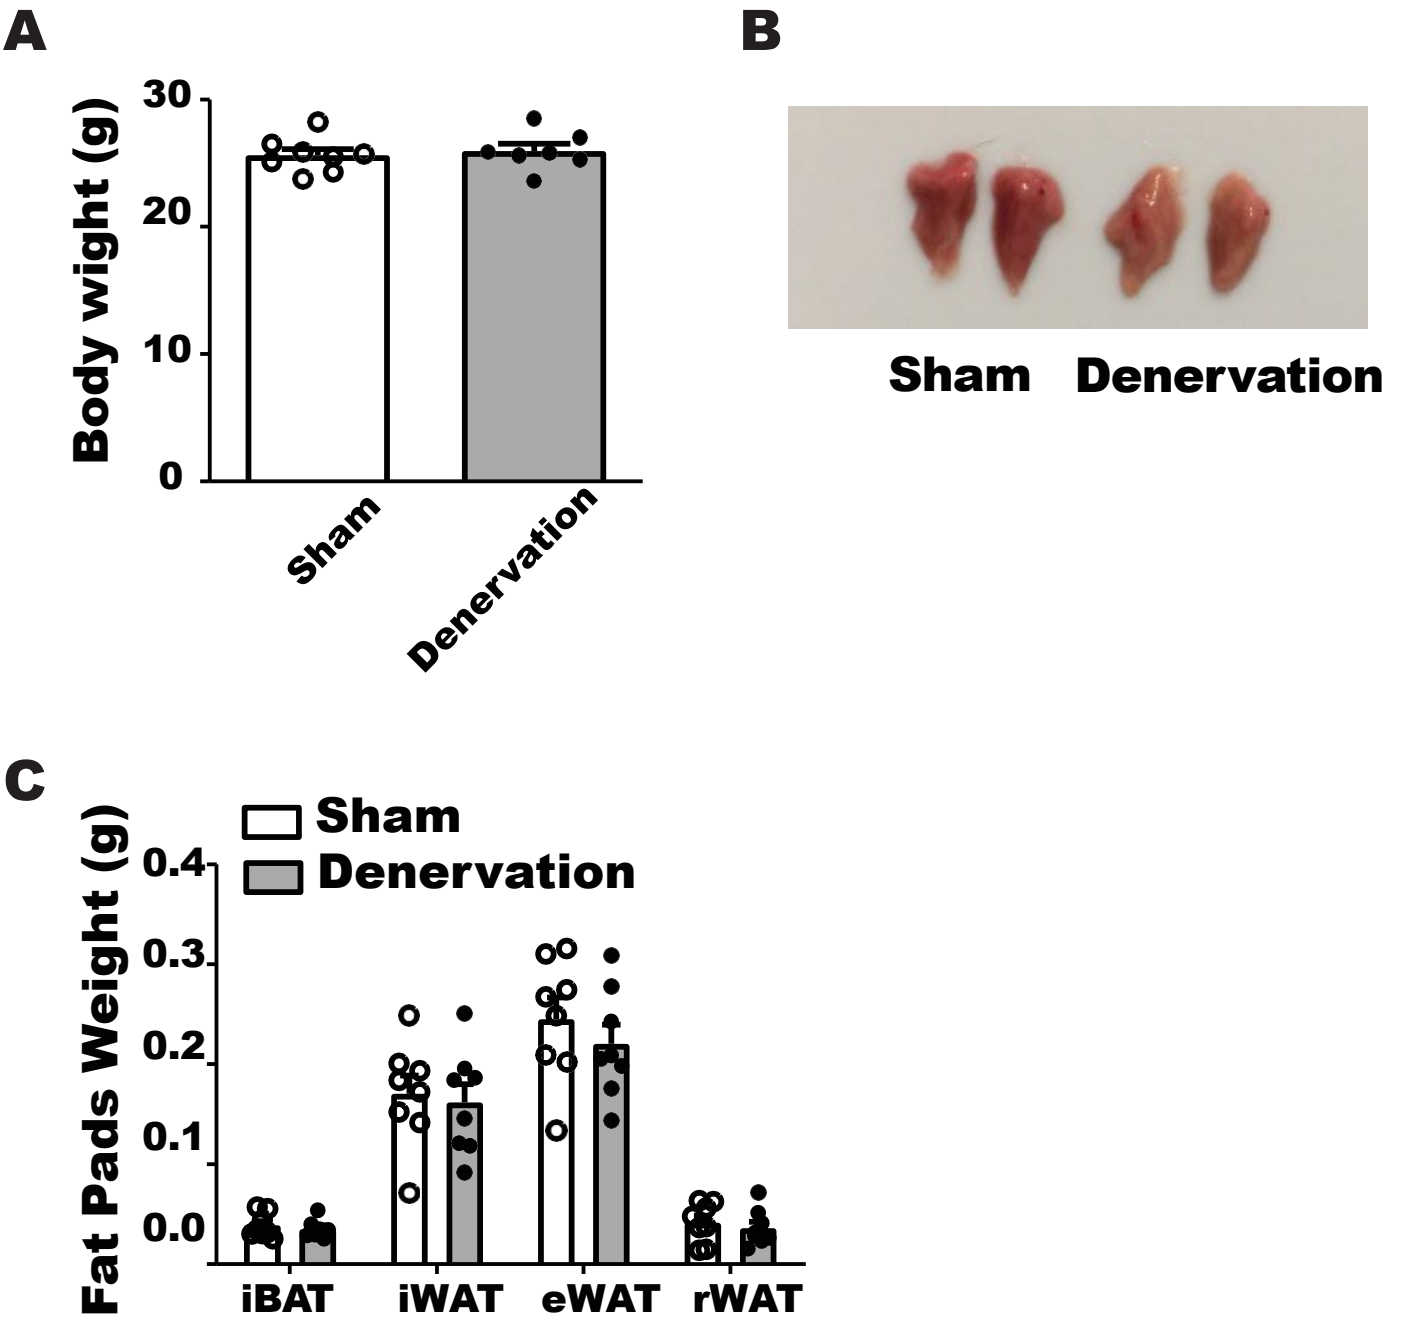

# Supplemental figure S3

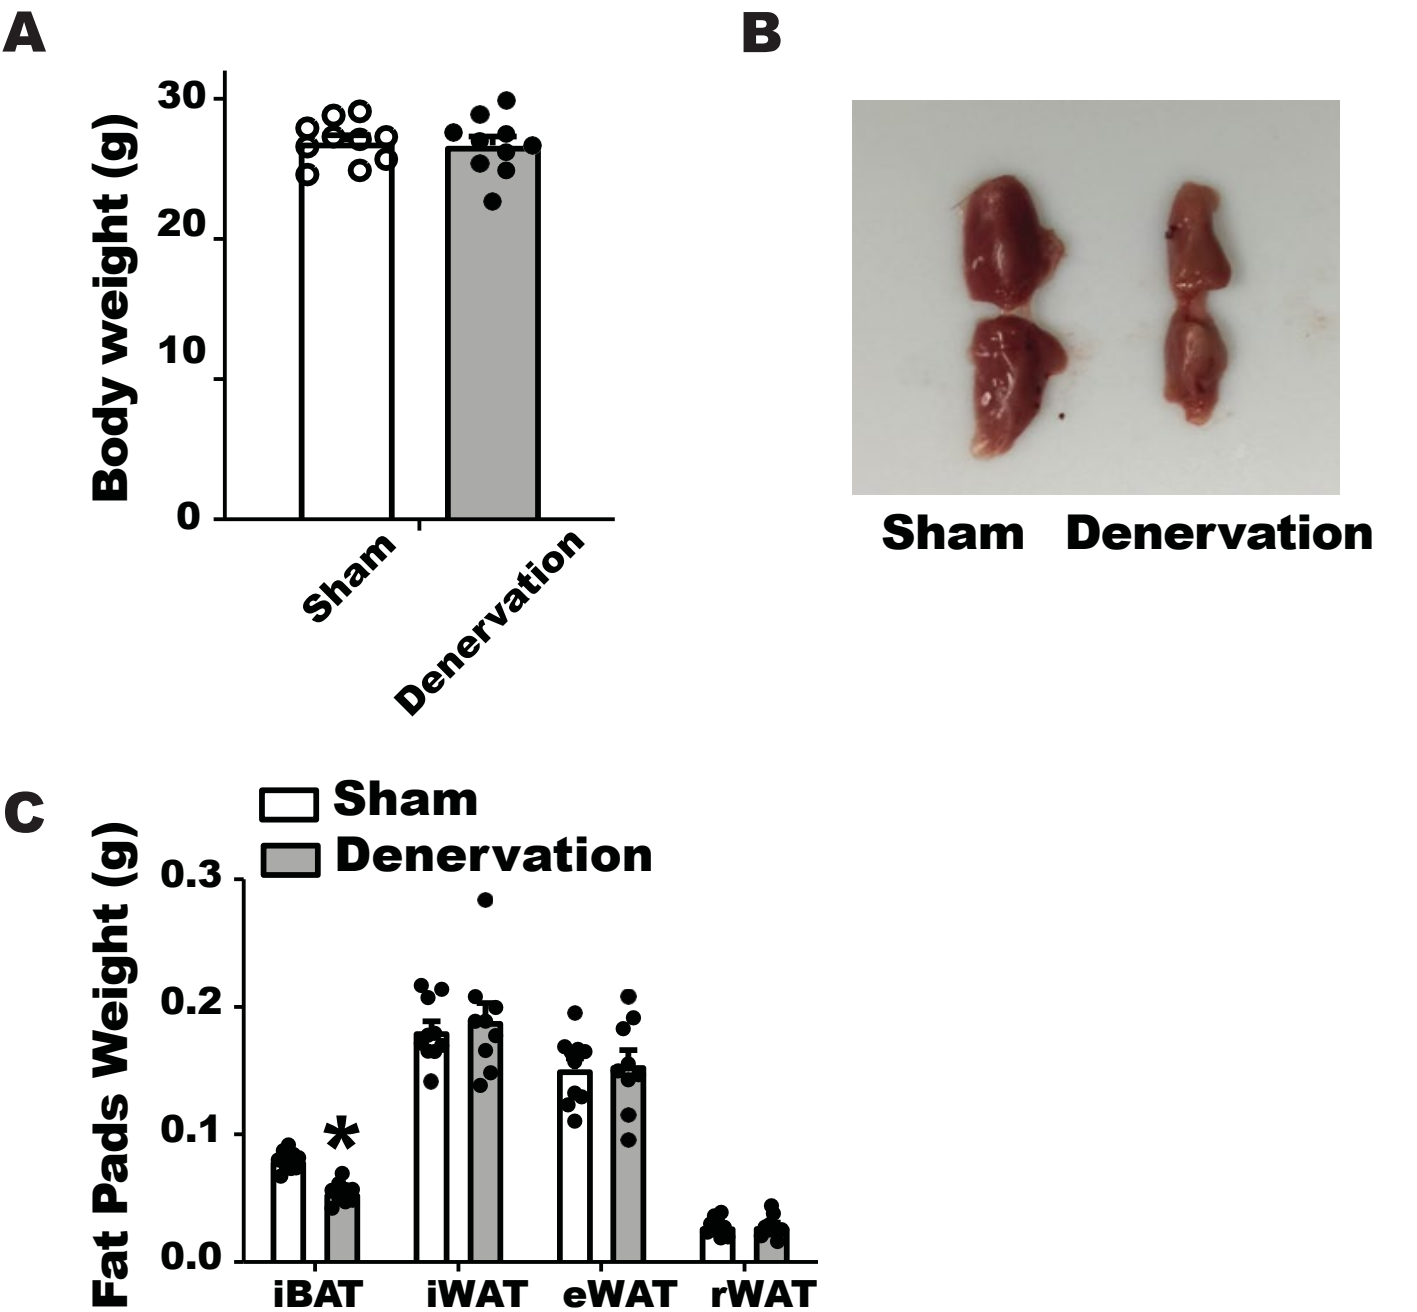

Supplemental figure S4

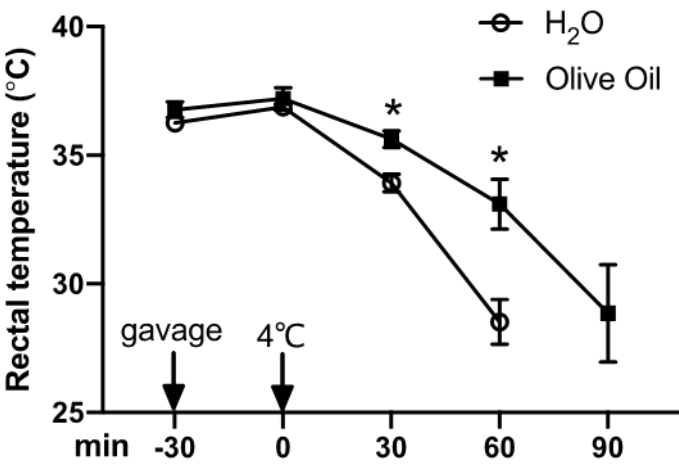

Supplement: s1 [file s1]
